# Supplementary figures and images for: Complete genome sequence of an alternavirus from the phytopathogenic fungus Fusarium incarnatum
Source: Springer Nature journal article supplement (doi:10.1007/s00705-018-04128-2), 2019-01-22

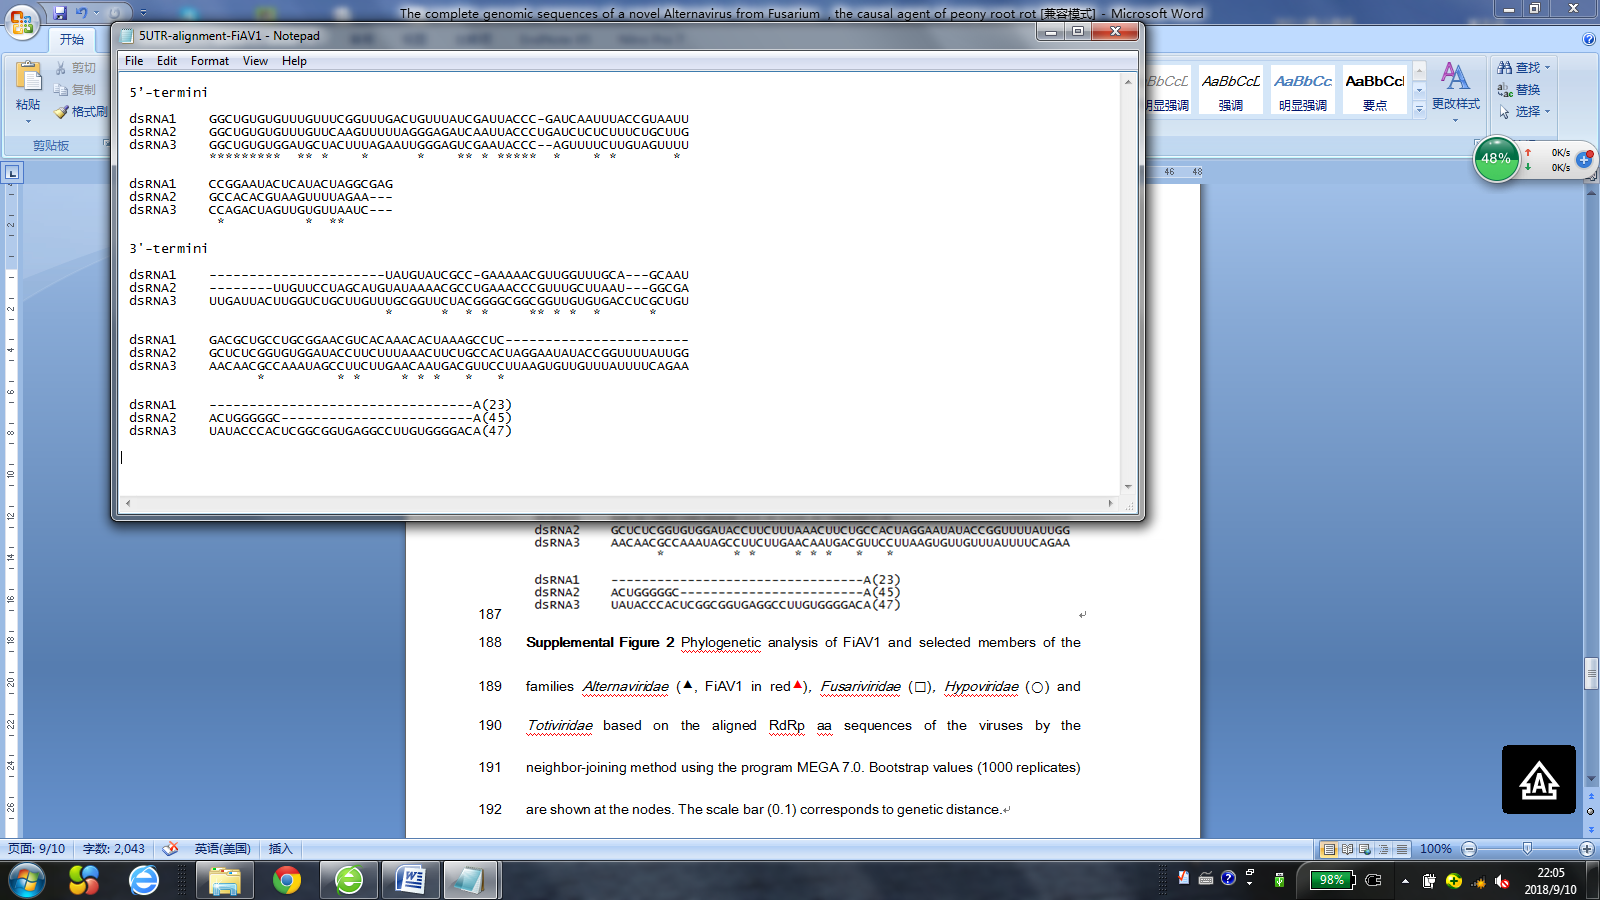

Supplement: MOESM1 [file 16411992]
